# Supplementary material for: Longitudinal Multi-omics Profiling Reveals Different Adaptation to Heat Stress in Genomically Divergent Lactating Sows
Source: Research Square preprint supplement (doi:10.21203/rs.3.rs-7899948/v1), 2025-12-18
Supplement: Supplementary file 1 [file 66246d1bbce2cfdba14715f4.xlsx]

## Sheet: Supplementary Table 1
Genomic context and key phenotypic differences between heat-tolerant (TOL) and heat-sensitive (SEN) lactating sows under heat stress (HS).
Trait	TOL (mean ± SD)	SEN (mean ± SD)	P-value	Source
Heat resilience indicator GEBV (regression of Tv on the environmental gradient)	–0.0363 ± 0.0048	0.0414 ± 0.0097	< 0.001	unpublished
Respiration rate (RR, bpm)	79 ± 1	75 ± 1	< 0.01	Byrd et al.
Maximum RR (bpm)	105 ± 3	96 ± 3	< 0.01	Byrd et al.
Shoulder skin temperature (°C)	37.29 ± 0.16	37.58 ± 0.16	< 0.05	Byrd et al.
Rump skin temperature (°C)	37.45 ± 0.17	37.66 ± 0.16	< 0.01	Byrd et al.
Tail skin temperature (°C)	36.69 ± 0.24	36.94 ± 0.24	< 0.01	Byrd et al.
Sow + litter total heat production (THP, kcal/h)	510.68 ± 52.49 (d4), 541.52 ± 52.14 (d18)	367.91 ± 53.57 (d4)	< 0.01	Byrd et al.
Sow + litter THP / kg BW (kcal/h/kg)	1.78 ± 0.18 (d4)	1.26 ± 0.18 (d4)	< 0.01	Byrd et al.
Sow + litter THP / kg BW^0.75 (kcal/h/kg BW^0.75)	7.37 ± 0.72 (d4), 7.21 ± 0.72 (d18)	5.11 ± 0.72 (d4)	< 0.01	Byrd et al.
Sow THP / kg BW^0.75 (kcal/h/kg BW^0.75)	6.65 ± 1.11 (d4), 6.05 ± 0.08 (d8)	3.54 ± 0.59 (d4)	< 0.01	Byrd et al.
Drinking behavior (% time)	3.97 ± 0.80	2.01 ± 0.80	0.03	Byrd et al.
Non-nutritive drinking (% time)	1.79 ± 0.57	0.60 ± 0.57	0.05	Byrd et al.

## Sheet: Supplementary Table 5
Top 20 MAGs contributing to variation along CCA1 and CCA2 axes.”
CCA1	CCA2	MAG	Domain	phylum	class	order	family	genus	species	Label	length
1	0.946752	-1.01383	MAG176	Bacteria	Bacteroidota	Bacteroidia	Bacteroidales	WCHB1-69	F23-D06	F23-D06 sp900315705	F23-D06 sp900315705	1.38715
2	0.735482	-1.1524	MAG695	Bacteria	Planctomycetota	Planctomycetia	Pirellulales	Thermoguttaceae	RGIG3701	RGIG3701 sp017454585	RGIG3701 sp017454585	1.3671
3	0.675152	-1.08257	MAG686	Bacteria	Bacillota_A	Clostridia	Oscillospirales	Ruminococcaceae	Firm-04	Firm-04 sp021152595	Firm-04 sp021152595	1.27584
4	0.90752	-0.677404	MAG209	Bacteria	Bacteroidota	Bacteroidia	Bacteroidales	Porphyromonadaceae	Porphyromonas_A	Porphyromonas_A sp934359325	Porphyromonas_A sp934359325	1.13246
5	0.869831	0.711261	MAG598	Bacteria	Actinomycetota	Actinomycetia	Mycobacteriales	Mycobacteriaceae	Corynebacterium	Corynebacterium sp001815935	Corynebacterium sp001815935	1.12361
6	0.62705	-0.903407	MAG239	Bacteria	Bacillota_A	Clostridia	Oscillospirales	Oscillospiraceae	Limivicinus	Limivicinus sp900549645	Limivicinus sp900549645	1.0997
7	0.6262	-0.887069	MAG707	Bacteria	Bacteroidota	Bacteroidia	Bacteroidales	Bacteroidaceae	Phocaeicola	Phocaeicola sp022764505	Phocaeicola sp022764505	1.08583
8	0.653536	-0.792072	MAG694	Bacteria	Bacillota_A	Clostridia	Lachnospirales	Lachnospiraceae	Acetatifactor	Acetatifactor sp016293615	Acetatifactor sp016293615	1.02688
9	0.531764	-0.864448	MAG595	Bacteria	Verrucomicrobiota	Verrucomicrobiae	Opitutales	UBA953	Spyradosoma	Spyradosoma sp004558035	Spyradosoma sp004558035	1.01491
10	0.658051	0.767358	MAG070	Bacteria	Bacteroidota	Bacteroidia	Bacteroidales	Bacteroidaceae	UBA4372	NA	UBA4372 MAG070	1.01088
11	0.768951	0.652388	MAG204	Bacteria	Bacteroidota	Bacteroidia	Bacteroidales	Bacteroidaceae	Prevotella	Prevotella sp022781445	Prevotella sp022781445	1.00841
12	0.627649	-0.782169	MAG696	Bacteria	Planctomycetota	Planctomycetia	Pirellulales	Thermoguttaceae	RUG369	NA	RUG369 MAG696	1.00286
13	0.623848	0.730266	MAG205	Bacteria	Bacillota_C	Negativicutes	Acidaminococcales	Acidaminococcaceae	NA	NA	Acidaminococcaceae MAG205	0.960456
14	-0.919342	-0.260537	MAG720	Bacteria	Bacillota_A	Clostridia	Tissierellales	Peptoniphilaceae	Peptoniphilus_A	Peptoniphilus_A harei	Peptoniphilus_A harei	0.955547
15	-0.364806	0.860776	MAG280	Bacteria	Pseudomonadota	Alphaproteobacteria	Rs-D84	Rs-D84	Enterousia	NA	Enterousia MAG280	0.93489
16	0.492673	-0.768884	MAG689	Bacteria	Bacillota_A	Clostridia	Christensenellales	CAG-917	RGIG4097	NA	RGIG4097 MAG689	0.913187
17	0.759936	0.49841	MAG768	Bacteria	Bacillota	Bacilli	RF39	UBA660	CAG-302	NA	CAG-302 MAG768	0.908799
18	-0.161551	0.882521	MAG489	Bacteria	Bacteroidota	Bacteroidia	Bacteroidales	Porphyromonadaceae	Porphyromonas	NA	Porphyromonas MAG489	0.897186
19	-0.857422	-0.230889	MAG213	Bacteria	Bacteroidota	Bacteroidia	Bacteroidales	Bacteroidaceae	Prevotella	Prevotella sp022779305	Prevotella sp022779305	0.887965
20	0.509069	0.727256	MAG037	Bacteria	Actinomycetota	Actinomycetia	Actinomycetales	Actinomycetaceae	Trueperella	Trueperella sp022783305	Trueperella sp022783305	0.887723

## Sheet: Supplementary Table 4
Alpha diveristy indices calculated per sample
SowID	Time	Treat	Observed	Chao1	se.chao1	Shannon	Simpson	InvSimpson
83109	Day 4	HT	835	835	0	5.18594	0.960357	25.2252
83143	Day 4	HT	835	835	0	5.0597	0.984172	63.1801
84637	Day 4	NHT	835	835	0	3.71363	0.951913	20.7956
87611	Day 4	NHT	835	835	0	5.24695	0.986623	74.756
88020	Day 4	HT	835	835	0	5.12284	0.956623	23.0535
81239	Day 4	NHT	835	835	0	4.86012	0.929521	14.1887
84253	Day 4	NHT	835	835	0	4.50059	0.974267	38.8612
84769	Day 4	HT	835	835	0	4.25962	0.96076	25.484
88422	Day 4	HT	835	835	0	5.20878	0.974774	39.6414
76969	Day 4	NHT	835	835	0	4.89006	0.949444	19.7802
82972	Day 4	NHT	835	835	0	5.66341	0.991041	111.614
87798	Day 4	HT	835	835	0	5.43044	0.973263	37.4015
88698	Day 4	HT	835	835	0	5.7285	0.991519	117.918
88890	Day 4	HT	835	835	0	5.0326	0.951092	20.4465
89153	Day 4	NHT	835	835	0	5.12514	0.956131	22.7951
89346	Day 4	NHT	835	835	0	4.88544	0.931803	14.6635
88799	Day 4	HT	835	835	0	4.89835	0.927218	13.7397
79697	Day 4	NHT	835	835	0	5.08455	0.977895	45.238
84660	Day 4	NHT	835	835	0	5.342	0.990571	106.058
83165	Day 4	HT	834	835	2.34419	4.02475	0.916451	11.969
83306	Day 4	HT	835	835	0	4.76877	0.961742	26.1386
87155	Day 4	HT	835	835	0.4997	4.29493	0.915846	11.883
89021	Day 4	HT	835	835	0	5.1517	0.987065	77.3078
78438	Day 4	NHT	835	835	0	5.11247	0.966964	30.2697
79416	Day 4	NHT	835	835	0	5.21729	0.980378	50.9637
83109	Day 8	HT	835	835	0	5.53534	0.98966	96.7086
83143	Day 8	HT	835	835	0	4.24453	0.967343	30.6214
84637	Day 8	NHT	834	834	0.166567	4.33736	0.969264	32.5356
87611	Day 8	NHT	835	835	0	4.44922	0.964503	28.1717
88020	Day 8	HT	835	835	0	5.74089	0.992465	132.722
81239	Day 8	NHT	835	835	0	4.70722	0.909094	11.0004
84253	Day 8	NHT	835	835	0	4.24575	0.971801	35.4626
84769	Day 8	HT	835	835	0.24985	3.59578	0.910033	11.1151
88422	Day 8	HT	835	835	0	5.4007	0.989334	93.7527
76969	Day 8	NHT	835	835	0	5.31259	0.986777	75.6235
82972	Day 8	NHT	835	835	0	5.64121	0.984725	65.4644
87798	Day 8	HT	835	835	0	5.87722	0.994988	199.531
88698	Day 8	HT	835	835	0	5.81143	0.99424	173.611
88890	Day 8	HT	835	835	0	4.97545	0.956162	22.8113
89153	Day 8	NHT	835	835	0	5.90072	0.995477	221.087
89346	Day 8	NHT	835	835	0	4.95483	0.964351	28.0513
88799	Day 8	HT	835	835	0	5.42905	0.971953	35.6546
79697	Day 8	NHT	835	835	0	3.84704	0.885445	8.72942
84660	Day 8	NHT	835	835	0	5.61466	0.993559	155.262
83165	Day 8	HT	835	835	0	5.11254	0.961364	25.8823
83306	Day 8	HT	835	835	0	5.58134	0.991938	124.037
87155	Day 8	HT	835	835	0	5.4203	0.981221	53.2514
89021	Day 8	HT	835	835	0	4.53454	0.911332	11.2781
78438	Day 8	NHT	835	835	0	5.41616	0.98763	80.838
79416	Day 8	NHT	835	835	0	5.02094	0.950177	20.0712
83109	Day 14	HT	835	835	0	5.68035	0.992011	125.171
83143	Day 14	HT	835	835	0	5.54637	0.990862	109.43
87611	Day 14	NHT	835	835	0	4.90097	0.972998	37.0339
88020	Day 14	HT	835	835	0	5.64094	0.987268	78.5402
81239	Day 14	NHT	835	835	0	5.28686	0.97384	38.226
84253	Day 14	NHT	835	835	0	4.01638	0.950668	20.2707
84769	Day 14	HT	835	835	0	4.06366	0.962302	26.5269
88422	Day 14	HT	835	835	0	4.75646	0.980716	51.8557
76969	Day 14	NHT	835	835	0	5.45136	0.987474	79.834
82972	Day 14	NHT	835	835	0	4.88016	0.960209	25.1316
87798	Day 14	HT	835	835	0	5.52761	0.978071	45.6012
88698	Day 14	HT	835	835	0	5.82718	0.994461	180.549
88890	Day 14	HT	835	835	0	5.71575	0.99232	130.211
89153	Day 14	NHT	835	835	0	5.70304	0.993358	150.547
89346	Day 14	NHT	835	835	0	4.19447	0.956869	23.1852
88799	Day 14	HT	835	835	0	5.6321	0.987276	78.589
79697	Day 14	NHT	835	835	0	5.86852	0.995075	203.046
84660	Day 14	NHT	835	835	0	5.60494	0.990711	107.648
83165	Day 14	HT	835	835	0	4.95506	0.94733	18.9861
83306	Day 14	HT	835	835	0	5.49594	0.989623	96.3707
87155	Day 14	HT	835	835	0	5.76831	0.993847	162.515
89021	Day 14	HT	835	835	0	4.95909	0.968388	31.6338
78438	Day 14	NHT	835	835	0	5.49102	0.985781	70.3277
79416	Day 14	NHT	835	835	0	5.07488	0.956678	23.0831

## Sheet: Supplementary Table 2
Total read counts by sample, time point, genetic background group, and omics type.
Total reads	Time	Sample ID	Genetic background	Omics type
113506136	T1	S037	HT	MG
155263632	T1	S038	HT	MG
167053704	T1	S039	NHT	MG
159954752	T1	S040	NHT	MG
173808680	T1	S041	HT	MG
180735644	T1	S042	NHT	MG
116785769	T1	S043	NHT	MG
156111710	T1	S044	HT	MG
168257620	T1	S045	HT	MG
118814041	T1	S046	NHT	MG
144244540	T1	S047	NHT	MG
133925261	T1	S048	HT	MG
147589409	T1	S049	HT	MG
161247627	T1	S050	HT	MG
151373145	T1	S051	NHT	MG
166223417	T1	S052	NHT	MG
106614756	T1	S053	HT	MG
131084494	T1	S054	NHT	MG
144790157	T1	S055	NHT	MG
114028031	T1	S056	HT	MG
144048829	T1	S057	HT	MG
128350478	T1	S058	HT	MG
148010483	T1	S059	HT	MG
126150218	T1	S060	NHT	MG
163744418	T1	S061	NHT	MG
153531891	T2	S062	HT	MG
170908607	T2	S063	HT	MG
165665939	T2	S064	NHT	MG
133349991	T2	S065	NHT	MG
147933385	T2	S066	HT	MG
190396624	T2	S067	NHT	MG
187360147	T2	S068	NHT	MG
164058741	T2	S069	HT	MG
130028843	T2	S070	HT	MG
165446506	T2	S071	NHT	MG
139796575	T2	S072	NHT	MG
162202457	T2	S073	HT	MG
142874566	T2	S074	HT	MG
168239828	T2	S075	HT	MG
153318388	T2	S076	NHT	MG
146747261	T2	S077	NHT	MG
133154280	T2	S078	HT	MG
141747749	T2	S079	NHT	MG
137958082	T2	S080	NHT	MG
154243565	T2	S081	HT	MG
162077914	T2	S082	HT	MG
142228129	T2	S083	HT	MG
139096761	T2	S084	HT	MG
126808517	T2	S085	NHT	MG
154765459	T2	S086	NHT	MG
141540177	T3	S087	HT	MG
143046554	T3	S088	HT	MG
587131	T3	S089	NHT	MG
148087581	T3	S090	NHT	MG
150958001	T3	S091	HT	MG
163157287	T3	S092	NHT	MG
136386468	T3	S093	NHT	MG
184305878	T3	S094	HT	MG
108951420	T3	S095	HT	MG
147156474	T3	S096	NHT	MG
148722158	T3	S097	NHT	MG
151764566	T3	S098	HT	MG
168186453	T3	S099	HT	MG
126927129	T3	S100	HT	MG
143770090	T3	S101	NHT	MG
133723620	T3	S102	NHT	MG
116696810	T3	S103	HT	MG
158383138	T3	S104	NHT	MG
157641810	T3	S105	NHT	MG
152932898	T3	S106	HT	MG
166626699	T3	S107	HT	MG
172634418	T3	S108	HT	MG
165167767	T3	S109	HT	MG
189050374	T3	S110	NHT	MG
184252502	T3	S111	NHT	MG
139752136	Pre	S001	NHT	MT
146739113	Pre	S002	NHT	MT
253923122	Pre	S003	NHT	MT
169405875	Pre	S004	HT	MT
163979952	Pre	S005	NHT	MT
160146556	Pre	S006	NHT	MT
173642123	Pre	S007	HT	MT
142376973	Pre	S008	HT	MT
163608572	Pre	S009	HT	MT
102765218	Pre	S010	NHT	MT
126728662	Pre	S011	NHT	MT
193337846	Pre	S012	NHT	MT
168789006	Pre	S013	NHT	MT
161940510	Pre	S014	HT	MT
144598958	Pre	S015	HT	MT
164735301	Pre	S016	HT	MT
159000944	Pre	S017	HT	MT
140608198	Pre	S018	NHT	MT
140066864	Post	S019	NHT	MT
147513346	Post	S020	NHT	MT
148319051	Post	S021	NHT	MT
156262804	Post	S022	HT	MT
159139424	Post	S023	NHT	MT
148451237	Post	S024	NHT	MT
182227922	Post	S025	HT	MT
210484266	Post	S026	HT	MT
198348327	Post	S027	HT	MT
181806186	Post	S028	NHT	MT
160624944	Post	S029	NHT	MT
159164603	Post	S030	NHT	MT
161531362	Post	S031	NHT	MT
136831453	Post	S032	HT	MT
90176070	Post	S033	HT	MT
136585965	Post	S034	HT	MT
142760942	Post	S035	HT	MT
168436510	Post	S036	NHT	MT

## Sheet: Supplementary Table 3
Differential abundance of microbial MAGs (HT vs. NHT) across time points.
contrast	Time	estimate	SE	df	t.ratio	p.value	log2FC	MAG	Domain	phylum	class	order	family	genus	species	Label
HT - NHT	Day 4	0.879359	0.417438	62.4641	2.10656	0.0391792	0.879359	MAG007	Bacteria	Bacillota_A	Clostridia	Christensenellales	CAG-138	SFEL01	SFEL01 sp004557245	SFEL01 sp004557245
HT - NHT	Day 4	1.23364	0.469722	45.8277	2.62631	0.011696	1.23364	MAG008	Bacteria	Bacillota_A	Clostridia	Oscillospirales	Oscillospiraceae	F23-B02	F23-B02 sp004556755	F23-B02 sp004556755
HT - NHT	Day 8	1.0029	0.469722	45.8277	2.1351	0.0381321	1.0029	MAG008	Bacteria	Bacillota_A	Clostridia	Oscillospirales	Oscillospiraceae	F23-B02	F23-B02 sp004556755	F23-B02 sp004556755
HT - NHT	Day 14	1.24045	0.477305	47.3865	2.59887	0.0124293	1.24045	MAG008	Bacteria	Bacillota_A	Clostridia	Oscillospirales	Oscillospiraceae	F23-B02	F23-B02 sp004556755	F23-B02 sp004556755
HT - NHT	Day 4	1.25207	0.467858	59.4597	2.67618	0.00960717	1.25207	MAG014	Bacteria	Actinomycetota	Actinomycetia	Actinomycetales	Bifidobacteriaceae	Bifidobacterium	Bifidobacterium choerinum	Bifidobacterium choerinum
HT - NHT	Day 14	-1.44176	0.617263	45.2565	-2.33573	0.0239949	-1.44176	MAG023	Bacteria	Bacteroidota	Bacteroidia	Bacteroidales	Bacteroidaceae	Prevotella	NA	Prevotella MAG023
HT - NHT	Day 14	-1.73225	0.826451	38.1868	-2.09601	0.0427618	-1.73225	MAG030	Bacteria	Bacteroidota	Bacteroidia	Bacteroidales	Bacteroidaceae	Bacteroides	Bacteroides fragilis	Bacteroides fragilis
HT - NHT	Day 14	-2.15061	0.904348	52.5608	-2.37808	0.0210723	-2.15061	MAG033	Bacteria	Campylobacterota	Campylobacteria	Campylobacterales	Campylobacteraceae	Campylobacter_B	Campylobacter_B hominis	Campylobacter_B hominis
HT - NHT	Day 14	-1.42604	0.614081	31.7394	-2.32223	0.0267964	-1.42604	MAG040	Bacteria	Bacteroidota	Bacteroidia	Bacteroidales	Porphyromonadaceae	Porphyromonas	NA	Porphyromonas MAG040
HT - NHT	Day 14	-1.10378	0.452756	38.9183	-2.43792	0.0194415	-1.10378	MAG042	Bacteria	Bacteroidota	Bacteroidia	Bacteroidales	Bacteroidaceae	Prevotella	NA	Prevotella MAG042
HT - NHT	Day 14	-0.941249	0.410893	33.9886	-2.29074	0.0283048	-0.941249	MAG052	Bacteria	Bacillota_A	Clostridia	Peptostreptococcales	Anaerovoracaceae	Eubacterium_B	NA	Eubacterium_B MAG052
HT - NHT	Day 14	-1.14167	0.45475	31.7432	-2.51056	0.0173476	-1.14167	MAG054	Bacteria	Bacillota_C	Negativicutes	Acidaminococcales	Acidaminococcaceae	Succiniclasticum	Succiniclasticum sp900544275	Succiniclasticum sp900544275
HT - NHT	Day 14	-1.26918	0.568174	26.754	-2.23378	0.0340578	-1.26918	MAG060	Bacteria	Bacillota	Bacilli	Erysipelotrichales	Erysipelotrichaceae	RGIG5681	NA	RGIG5681 MAG060
HT - NHT	Day 14	-0.999208	0.449121	32.8253	-2.22481	0.0330838	-0.999208	MAG061	Bacteria	Bacillota_A	Clostridia	Saccharofermentanales	DTU023	SFGY01	SFGY01 sp004556455	SFGY01 sp004556455
HT - NHT	Day 14	-1.10615	0.509628	37.8947	-2.17051	0.0363022	-1.10615	MAG069	Bacteria	Bacteroidota	Bacteroidia	Bacteroidales	Bacteroidaceae	Prevotella	Prevotella sp022773395	Prevotella sp022773395
HT - NHT	Day 14	-1.17827	0.561671	48.9378	-2.09778	0.0411113	-1.17827	MAG074	Bacteria	Bacillota_A	Clostridia	Tissierellales	Peptoniphilaceae	Ezakiella	Ezakiella sp022778715	Ezakiella sp022778715
HT - NHT	Day 14	0.995192	0.46097	42.9677	2.15891	0.0364857	0.995192	MAG076	Bacteria	Bacillota_A	Clostridia	Oscillospirales	Butyricicoccaceae	Butyricicoccus_A	NA	Butyricicoccus_A MAG076
HT - NHT	Day 14	0.540548	0.214309	43.3657	2.52228	0.0154086	0.540548	MAG100	Bacteria	Bacillota_A	Clostridia	Christensenellales	UBA1242	UMGS687	UMGS687 sp900544595	UMGS687 sp900544595
HT - NHT	Day 14	1.2453	0.550186	39.7305	2.26342	0.029145	1.2453	MAG106	Bacteria	Spirochaetota	Spirochaetia	Treponematales	Treponemataceae	Treponema_D	Treponema_D sp018384055	Treponema_D sp018384055
HT - NHT	Day 14	1.42322	0.652289	48.8089	2.18188	0.0339625	1.42322	MAG123	Bacteria	Spirochaetota	Spirochaetia	Treponematales	Treponemataceae	Treponema_D	Treponema_D sp018385395	Treponema_D sp018385395
HT - NHT	Day 14	1.14145	0.472826	48.3658	2.41409	0.019607	1.14145	MAG139	Bacteria	Spirochaetota	Spirochaetia	Treponematales	Treponemataceae	Treponema_D	Treponema_D sp017381365	Treponema_D sp017381365
HT - NHT	Day 14	1.20949	0.48667	54.6954	2.48523	0.0160343	1.20949	MAG156	Bacteria	Bacillota_A	Clostridia	Lachnospirales	Lachnospiraceae	RGIG8767	RGIG8767 sp016294075	RGIG8767 sp016294075
HT - NHT	Day 14	-0.968569	0.472731	40.7914	-2.04888	0.046944	-0.968569	MAG201	Bacteria	Bacillota_A	Clostridia	Peptostreptococcales	Anaerovoracaceae	Hornefia	Hornefia butyriciproducens	Hornefia butyriciproducens
HT - NHT	Day 8	0.74016	0.355804	66.3676	2.08024	0.0413678	0.74016	MAG207	Bacteria	Bacteroidota	Bacteroidia	Bacteroidales	Bacteroidaceae	Alloprevotella	Alloprevotella sp004557185	Alloprevotella sp004557185
HT - NHT	Day 14	-1.48247	0.659762	37.4767	-2.24697	0.0306147	-1.48247	MAG220	Bacteria	Campylobacterota	Campylobacteria	Campylobacterales	Campylobacteraceae	Campylobacter_D	Campylobacter_D coli	Campylobacter_D coli
HT - NHT	Day 4	2.08458	0.535089	50.1272	3.89577	0.00029067	2.08458	MAG232	Bacteria	Actinomycetota	Actinomycetia	Actinomycetales	Bifidobacteriaceae	Bifidobacterium	Bifidobacterium boum	Bifidobacterium boum
HT - NHT	Day 14	1.2631	0.564595	46.3143	2.23717	0.0301283	1.2631	MAG249	Bacteria	Spirochaetota	Spirochaetia	Treponematales	Treponemataceae	Treponema_D	Treponema_D sp900769985	Treponema_D sp900769985
HT - NHT	Day 14	1.16397	0.511523	40.2007	2.27549	0.0282793	1.16397	MAG277	Bacteria	Spirochaetota	Spirochaetia	Treponematales	Treponemataceae	Treponema_D	Treponema_D sp016296655	Treponema_D sp016296655
HT - NHT	Day 4	1.23018	0.512072	39.6855	2.40236	0.0210613	1.23018	MAG279	Bacteria	Pseudomonadota	Alphaproteobacteria	Rs-D84	Rs-D84	Enterousia	Enterousia sp945483255	Enterousia sp945483255
HT - NHT	Day 4	0.739908	0.35791	39.9494	2.0673	0.0452268	0.739908	MAG292	Bacteria	Bacillota_A	Clostridia	Christensenellales	UBA1242	UMGS1470	UMGS1470 sp900552105	UMGS1470 sp900552105
HT - NHT	Day 14	1.36298	0.63172	35.3935	2.15757	0.0378288	1.36298	MAG347	Bacteria	Spirochaetota	Spirochaetia	Treponematales	Treponemataceae	Treponema_D	Treponema_D sp016292805	Treponema_D sp016292805
HT - NHT	Day 4	0.642119	0.306617	47.075	2.09421	0.0416516	0.642119	MAG390	Bacteria	Bacillota_A	Clostridia	Oscillospirales	Oscillospiraceae	Limivicinus	NA	Limivicinus MAG390
HT - NHT	Day 4	0.65062	0.285485	43.6024	2.279	0.02762	0.65062	MAG424	Bacteria	Bacillota	Bacilli	RFN20	CAG-826	Enteromonas	Enteromonas sp900539595	Enteromonas sp900539595
HT - NHT	Day 4	1.04209	0.49002	48.7378	2.12662	0.0385405	1.04209	MAG456	Bacteria	Bacillota_A	Clostridia	Christensenellales	CAG-138	UBA1685	UBA1685 sp004560435	UBA1685 sp004560435
HT - NHT	Day 14	-0.748637	0.355879	53.8696	-2.10363	0.0400952	-0.748637	MAG475	Bacteria	Bacillota_A	Clostridia	Oscillospirales	Ruminococcaceae	Ruminococcus	NA	Ruminococcus MAG475
HT - NHT	Day 14	1.29365	0.607619	37.0692	2.12905	0.0399578	1.29365	MAG478	Bacteria	Spirochaetota	Spirochaetia	Treponematales	Treponemataceae	Treponema_D	Treponema_D sp016297405	Treponema_D sp016297405
HT - NHT	Day 14	-1.8479	0.896207	27.9883	-2.06191	0.0486118	-1.8479	MAG489	Bacteria	Bacteroidota	Bacteroidia	Bacteroidales	Porphyromonadaceae	Porphyromonas	NA	Porphyromonas MAG489
HT - NHT	Day 14	1.09313	0.473237	57.4113	2.3099	0.0245104	1.09313	MAG499	Bacteria	Bacillota_A	Clostridia	Lachnospirales	Lachnospiraceae	V9D3004	NA	V9D3004 MAG499
HT - NHT	Day 14	0.494327	0.201671	52.4715	2.45115	0.0176061	0.494327	MAG534	Bacteria	Bacillota_A	Clostridia	Christensenellales	UBA1242	UBA7862	NA	UBA7862 MAG534
HT - NHT	Day 14	1.33071	0.547483	35.433	2.4306	0.0202706	1.33071	MAG570	Bacteria	Bacillota_A	Clostridia	Oscillospirales	Butyricicoccaceae	Butyricicoccus_A	Butyricicoccus_A sp945872165	Butyricicoccus_A sp945872165
HT - NHT	Day 14	0.706159	0.338647	34.7509	2.08523	0.0444607	0.706159	MAG571	Bacteria	Bacillota_A	Clostridia	Peptostreptococcales	Peptostreptococcaceae	Intestinibacter	NA	Intestinibacter MAG571
HT - NHT	Day 8	-1.71366	0.66432	51.0831	-2.57957	0.0128128	-1.71366	MAG595	Bacteria	Verrucomicrobiota	Verrucomicrobiae	Opitutales	UBA953	Spyradosoma	Spyradosoma sp004558035	Spyradosoma sp004558035
HT - NHT	Day 14	-1.58554	0.67654	52.6059	-2.3436	0.0229112	-1.58554	MAG595	Bacteria	Verrucomicrobiota	Verrucomicrobiae	Opitutales	UBA953	Spyradosoma	Spyradosoma sp004558035	Spyradosoma sp004558035
HT - NHT	Day 8	1.1177	0.541777	46.0252	2.06303	0.0447777	1.1177	MAG615	Bacteria	Spirochaetota	Spirochaetia	Treponematales	Treponemataceae	Treponema_D	NA	Treponema_D MAG615
HT - NHT	Day 8	1.27225	0.499377	48.2606	2.54767	0.0140836	1.27225	MAG633	Bacteria	Bacillota	Bacilli	ML615J-28	CAG-698	CAG-698	CAG-698 sp000431235	CAG-698 sp000431235
HT - NHT	Day 14	1.16338	0.530559	59.8882	2.19274	0.0322221	1.16338	MAG634	Bacteria	Bacillota_A	Clostridia	Lachnospirales	Lachnospiraceae	RGIG4034	RGIG4034 sp016293925	RGIG4034 sp016293925
HT - NHT	Day 14	0.431032	0.197338	49.6321	2.18423	0.0336982	0.431032	MAG671	Bacteria	Bacillota	Bacilli	RFN20	CAG-826	CAG-826	NA	CAG-826 MAG671
HT - NHT	Day 4	1.0339	0.485195	50.6098	2.1309	0.0379776	1.0339	MAG682	Bacteria	Bacteroidota	Bacteroidia	Bacteroidales	Muribaculaceae	CAG-873	CAG-873 sp004554255	CAG-873 sp004554255
HT - NHT	Day 4	0.769038	0.364285	52.0651	2.11109	0.0395843	0.769038	MAG687	Bacteria	Bacillota_A	Clostridia	Oscillospirales	Acutalibacteraceae	RUG806	RUG806 sp900313475	RUG806 sp900313475
HT - NHT	Day 8	0.841064	0.364285	52.0651	2.30881	0.0249563	0.841064	MAG687	Bacteria	Bacillota_A	Clostridia	Oscillospirales	Acutalibacteraceae	RUG806	RUG806 sp900313475	RUG806 sp900313475
HT - NHT	Day 14	1.30758	0.619911	44.6668	2.1093	0.0405567	1.30758	MAG708	Bacteria	Bacillota	Bacilli	RF39	UBA660	RUG705	RUG705 sp934098395	RUG705 sp934098395
HT - NHT	Day 14	0.88739	0.40518	49.277	2.19011	0.0332781	0.88739	MAG709	Bacteria	Bacillota_A	Clostridia	Christensenellales	UBA1242	HGM11367	NA	HGM11367 MAG709
HT - NHT	Day 4	1.30086	0.536529	50.9651	2.42458	0.0189106	1.30086	MAG748	Bacteria	Bacillota_A	Clostridia	Oscillospirales	CAG-272	CAG-841	CAG-841 sp002479075	CAG-841 sp002479075
HT - NHT	Day 14	0.909827	0.405183	58.3168	2.24547	0.028543	0.909827	MAG779	Bacteria	Bacillota_A	Clostridia	Christensenellales	CAG-138	RGIG3141	NA	RGIG3141 MAG779
HT - NHT	Day 14	1.10923	0.440193	51.6983	2.51986	0.014869	1.10923	MAG782	Bacteria	Verrucomicrobiota	Lentisphaeria	UBA1407	UBA1407	CAAGGB01	CAAGGB01 sp945827525	CAAGGB01 sp945827525
HT - NHT	Day 14	1.09986	0.516597	60.9964	2.12905	0.0372959	1.09986	MAG809	Bacteria	Bacillota_A	Clostridia	Christensenellales	DTU072	CAG-1782	NA	CAG-1782 MAG809
HT - NHT	Day 14	1.14223	0.393234	64.8016	2.9047	0.00502299	1.14223	MAG812	Bacteria	Bacillota_A	Clostridia	Lachnospirales	Lachnospiraceae	NA	NA	Lachnospiraceae MAG812
